# Supplementary figures and images for: Intra- and Intertumoral Microglia/Macrophage Infiltration and Their Associated Molecular Signature Is Highly Variable in Canine Oligodendroglioma: A Preliminary Evaluation
Source: MDPI journal article supplement (doi:10.3390/vetsci10060403), 2023-06-19

Beta Actin  
43 kd

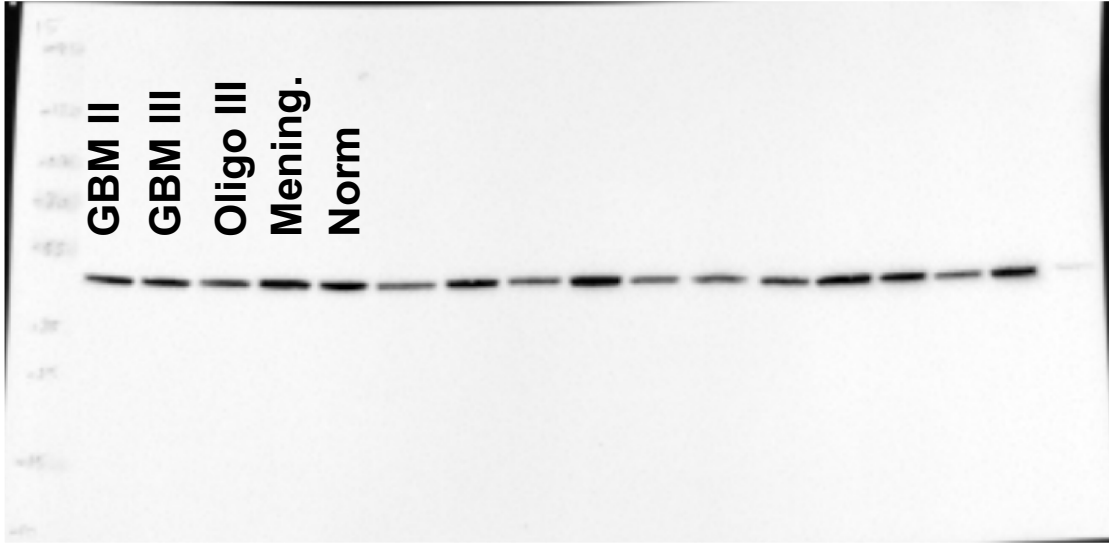

Gal3  
30 kd

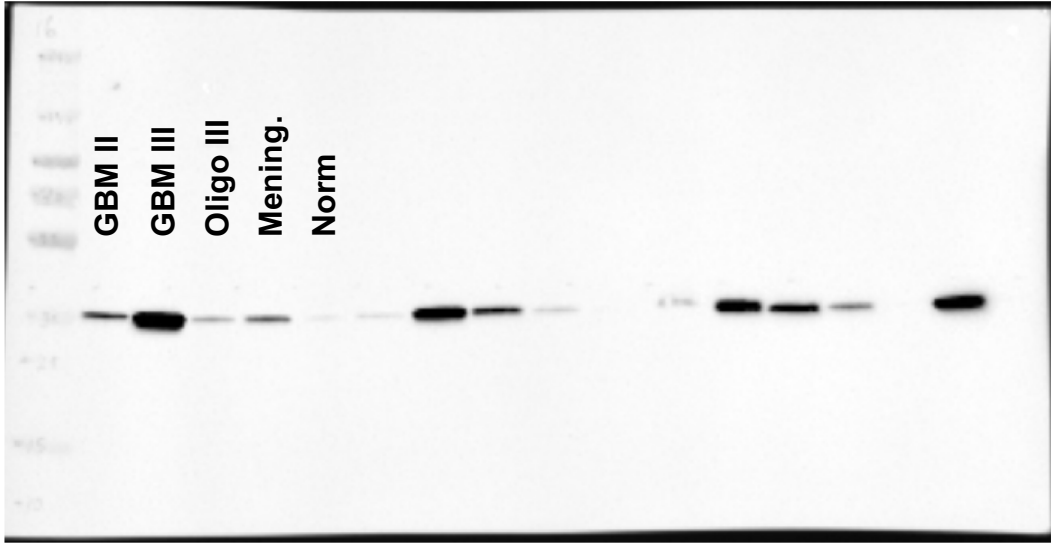

Smad2/3  
58 kd

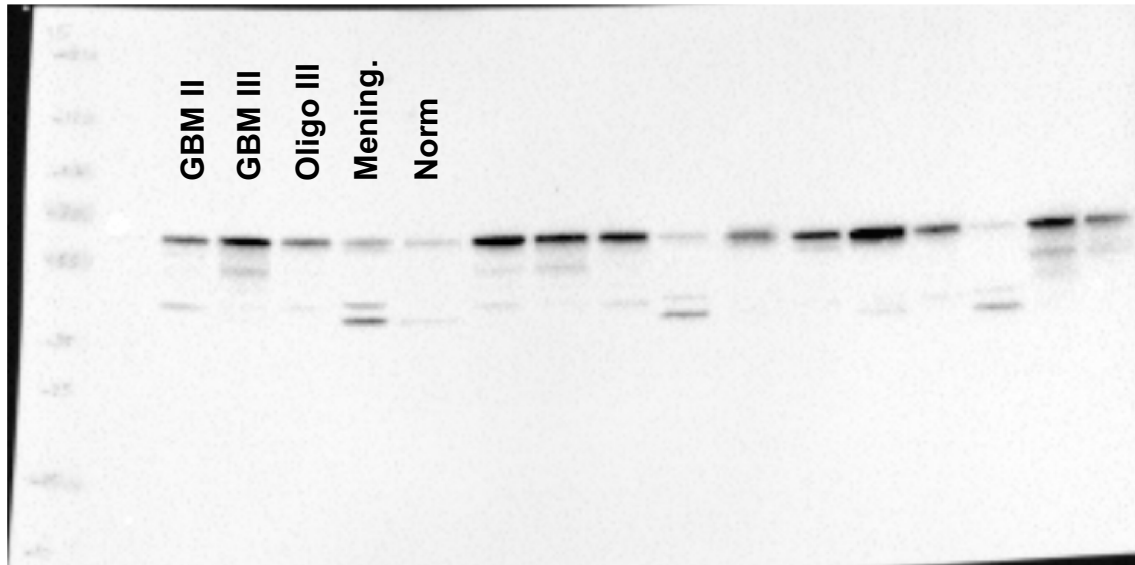

Psmad2/3  
55-60 kD

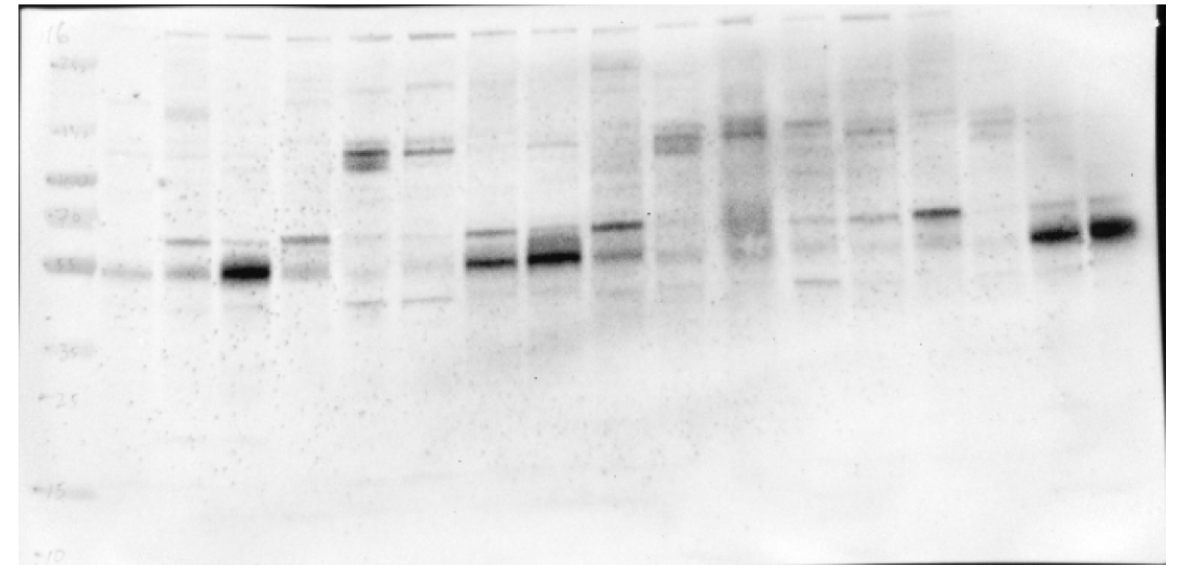

Tgfb1  
44/13

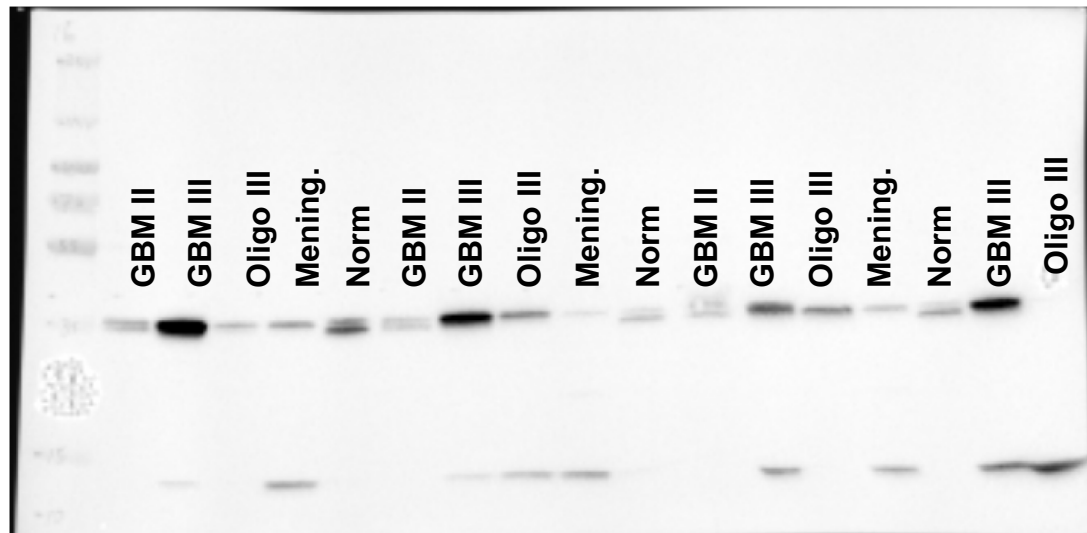

Hsp60  
60kd

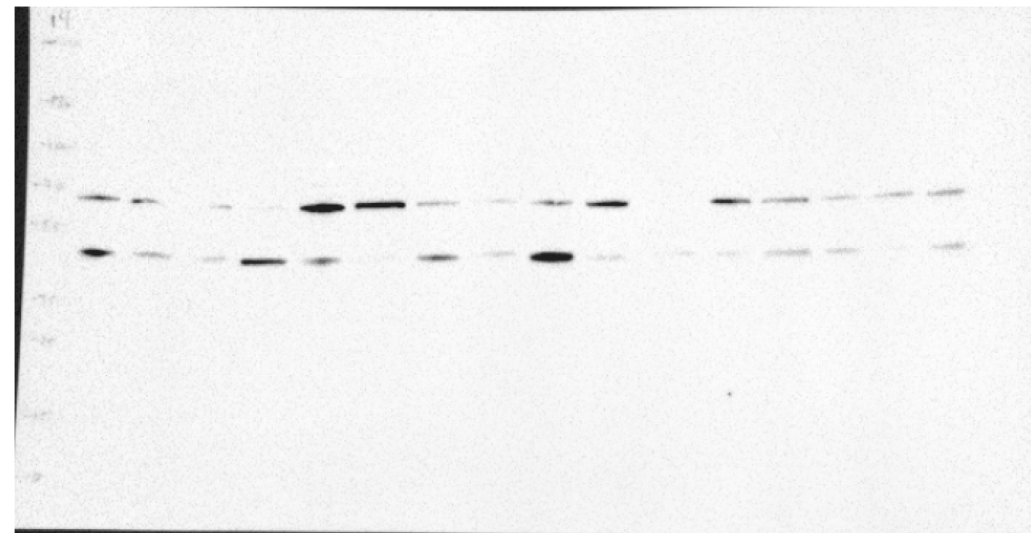

TGFbR1  
53kd

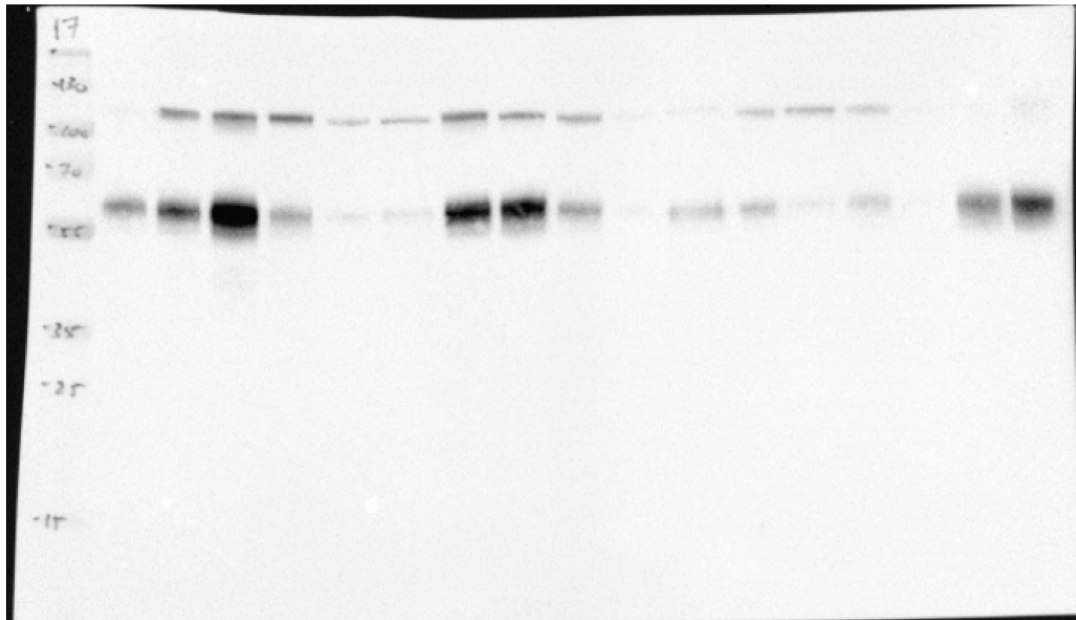

TGFbR2  
64/65/75 kd

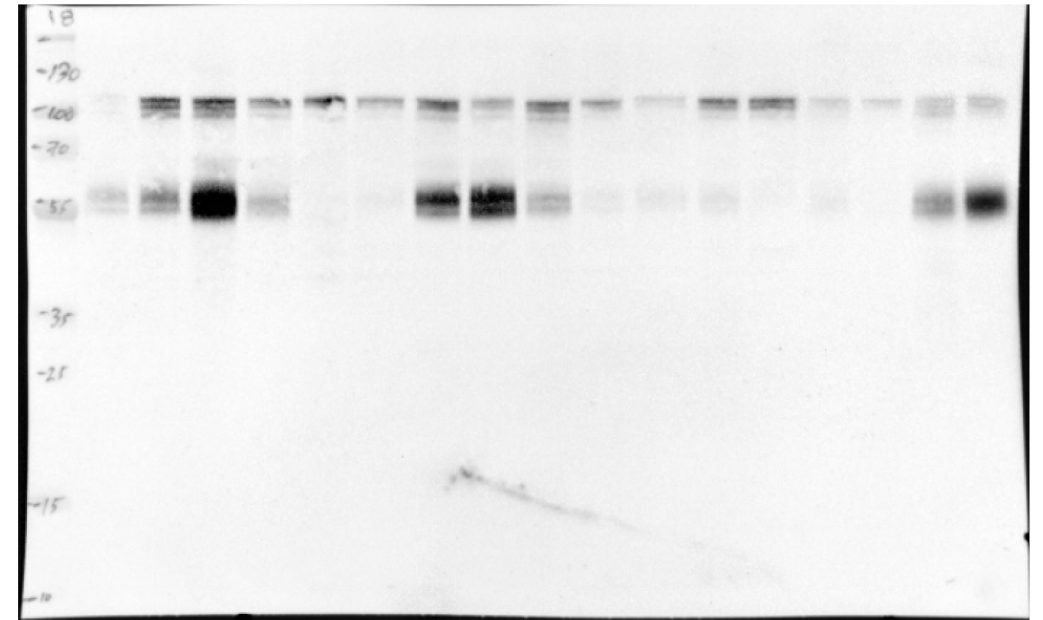

Supplement: s1 [file s1]
